# Supplementary material
Source: publisher figshare collection journal article supplement (https://frontiersin.figshare.com/ndownloader/files/27975336)
Supplement: Supplementary file 1 [file 27975336]

Supplementary Tables

**TABLE S1** Properties of the soils from Quzhou and Huantai Experimental Stations

| **Variable** | **Quzhou soil** | **Huantai soil** |
| --- | --- | --- |
| Soil type | Cambisol | Cambisol |
| pH (soil:water ratio of 1:2.5)  ) | 7.7 | 8.2 |
| Soil organic C (g kg-1) | 7.6 | 8.4 |
| Soil inorganic C (g kg-1) | 7.8 | 5.2 |
| Total N (g kg-1) | 0.66 | 0.67 |
| Soil available K (mg kg-1) | 118 | 174 |
| Olsen-P (mg kg-1) | 15.9 | 5.2 |
| Soil bulk density (g cm-3) | 1.39 | 1.38 |
| SOC-δ13C (‰) | −22.2 | −22.5 |
| SIC-δ13C (‰) | −3.4 | −2.7 |

**TABLE S2** Contributions of carbonate dissolution to soil CO2 emissions

|  | **Location** | **Soil type** | **CO2 partitioning method** | **Soil** | **CO2** | **References** |
| --- | --- | --- | --- | --- | --- | --- |
| **(SIC/STC)/%** | **(SIC/STC)/%** |
| **Carbonate rich soils** | USA | Desert soil | 13C natural abundance | 96 | 13 | Stevenson and Verburg, 2006 |
| France | Rendosol/Rendzina | 13C natural abundance | 74 | 27 | Bertrand et al., 2007 |
| Italy | Leptosols | 13C natural abundance | — | 15~40 | Inglima et al., 2009 |
| Slovenia | Rendzic leptosol | 13C natural abundance | — | 17 | Čater and Ogrinc, 2011 |
| Israel | Typic Calciorthid | 13C natural abundance | 86 | 30 | Tamir et al., 2011 |
| Slovenia | Rendzic leptosol | 13C natural abundance | — | 14 | Plestenjak et al., 2012 |
| Canada | Typic Hapludalf | 13C natural abundance | 28~34 | 62~74 | Ramnarine et al., 2012 |
| Antarctica | Typic Haploturbels | 13C natural abundance | 83 | 76 | Shanhun et al., 2012 |
| Belgium | Luvisol | Biotic/abiotic model | — | 60 | Buysse et al., 2013 |
| China | Loess soil | 13C natural abundance | 45 | 31~85 | Dong, 2013 |
| Australia | Rudosols/Regosol | 13C natural abundance | 85 | 95 | Lardner et al., 2015 |
| China | — | Soil sterilization at 120℃ | 46 | 33 | Ma et al., 2015 |
| China | Loess soil | Soil sterilization with HgCl2 | 50 | 54 | Meng et al., 2015 |
| Austria | Leptic Histosols | 13C natural abundance | — | 2.7 | Schindlbacher et al., 2015 |
| Tunisia | Calcari-Leptic  Cambisol | 13C natural abundance | 67 | 24~47 | Chevallier et al., 2016 |
| China | — | Soil sterilization at 120℃ | 46 | 35 | Ma et al., 2017 |
| China | Loess soil | Dry combustion | 42 | 27 | Meng et al., 2017 |
| China | Loess soil | 13C natural abundance | 38 | 24~38 | Yu, 2018 |
| France | Fluvisol | 13C natural abundance | 84 | 20~60 | Cardinael et al., 2019 |
| China | Typic Paleudalfs | 13C natural abundance | 36 | 31 | Zhang et al., 2019 |
| Trinidad and Tobago | Aquentic Eutrudepts | 13C natural abundance | 16 | 27 | Bramble et al., 2020a |
| Australia | Sodosol | 13C natural abundance | 13 | 51 | Fang et al., 2020a |
| Australia | Sodosol | 13C natural abundance | 14 | 42 | Fang et al., 2020b |
| China | Solonchaks | Soil sterilization at 120℃ | 42 | 56 | Wang et al., 2020 |
| China | Solonetz | Soil sterilization at 120℃ | 50 | 58 |  |
| **Soils amended with lime** | Finland | Peatland | 13C natural abundance | — | 53~70 | Biasi et al., 2008 |
| Japan | Andisol | Using Ca13CO3 as tracer | — | 77 | Dumale et al., 2011 |
| Japan | Ultisol | Using Ca13CO3 as tracer | — | 66 |  |
| China | Krasnozem | Using Ca14CO3 as tracer | **—** | 40 | Ge et al., 2012 |
| China | Brown rendzina | Using Ca14CO3 as tracer | **—** | 48 |  |
| China | Black rendzina | Using Ca14CO3 as tracer | **—** | 20 |  |
| China | Brown rendzina/ Krasnozem | Using Ca14CO3 as tracer | — | 18 | Huang et al., 2013 |
| Australia | Chromic Luvisol | 13C natural abundance | — | 75 | Ahmad et al., 2014 |
| China | Brown rendzina/ Krasnozem | Using Ca14CO3 as tracer | — | 27 | Xiao et al., 2014 |
| Australia | Luvisol | Using Ca13CO3 as tracer | — | 5 | Grover et al., 2017 |
| South Korea | Loamy skeletal | Using Ca13CO3 as tracer | — | 75 | Cho et al., 2019 |
| Trinidad and Tobago | Mollic Fluvaquents/  Kanhaplaquults | Using Ca13CO3 as tracer | — | 48 | Bramble et al., 2020b |
| **Total** |  |  | **Mean ± SE** | — | **42±4** |  |
|  |  | **95% confidence intervals** | — | **27~59** |  |

**TABLE S3** Contributions of root-derived respiration and soil native C release to total CO2 efflux from wheat- and maize-planted soil

| **Crop type** | **Site** | **CO2 partitioning method** | **Crop age (days)** | **Root-derived CO2 (%)** | **Soil-derived CO2 (%)** | **References** |
| --- | --- | --- | --- | --- | --- | --- |
| **Wheat** | Field(a) | 13C natural abundance | 190 | 25.2 | 74.8 | Kou et al., 2011 |
| Field(b) | 13C natural abundance | 190 | 29.2 | 70.8 |  |
| Field(c) | 13C natural abundance | 190 | 36.5 | 63.5 |  |
| Field(d) | 13C natural abundance | 190 | 37.2 | 62.8 |  |
| Laboratory | 13C natural abundance | 17 | 89.0 | 11.0 | Cheng, 1996 |
| Laboratory(e) | 13C continuous labeling | 60 | 31.6 | 68.4 | Pausch et al., 2013 |
| Laboratory(f) | 13C continuous labeling | 60 | 55.2 | 44.8 |  |
| Laboratory(g) | 13C pulse labeling | 230 | 39.8 | 60.2 | Sun, 2018 |
| Laboratory(h) | 13C pulse labeling | 230 | 41.5 | 58.5 |  |
| Laboratory(i) | 13C natural abundance | 32 | 58.6 | 41.4 | Xu et al., 2018 |
| Laboratory(j) | 13C natural abundance | 32 | 59.6 | 40.4 |  |
| Laboratory(k) | 13C natural abundance | 32 | 84.3 | 15.7 |  |
| Laboratory(l) | 13C natural abundance | 32 | 84.7 | 15.3 |  |
| Laboratory(m) | 13C natural abundance | 52 | 47.9 | 52.1 |  |
| Laboratory(n) | 13C natural abundance | 52 | 43.3 | 56.7 |  |
| Laboratory(o) | 13C natural abundance | 52 | 58.9 | 41.1 |  |
| Laboratory(p) | 13C natural abundance | 52 | 57.5 | 42.5 |  |
| Laboratory(q) | 13C natural abundance | 42 | 32.5 | 67.5 | Xu et al., 2019 |
| Laboratory(r) | 13C natural abundance | 42 | 28.6 | 71.4 |  |
| Laboratory(s) | 13C natural abundance | 42 | 32.8 | 67.2 |  |
| Laboratory(t) | 13C natural abundance | 42 | 31.1 | 68.9 |  |
| **Maize** | Field | 13C natural abundance | 158 | 28.0 | 72.0 | Rochette et al., 1999 |
| Field(u) | 13C natural abundance | 50 | 60.1 | 39.9 | Kumar et al., 2016 |
| Field(v) | 13C natural abundance | 50 | 50.8 | 49.2 |  |
| Laboratory | 14C pulse labeling/  13C natural abundance | 38 | 75.0 | 25.0 | Kuzyakov and Cheng, 2001 |
| Laboratory(w) | 13C natural abundance | 63 | 82.2 | 17.8 | Kuzyakov and Cheng, 2004 |
| Laboratory(x) | 13C natural abundance | 63 | 68.1 | 31.9 |  |
| Laboratory(y) | 13C natural abundance | 63 | 55.6 | 44.4 |  |
| Laboratory | 13C pulse labeling | 99 | 51.9 | 48.1 | Yang and Cai, 2005 |
| Laboratory(z) | 13C pulse labeling | 40 | 81.5 | 18.5 | Werth and Kuzyakov, 2008 |
| Laboratory(aa) | 13C natural abundance | 40 | 79.0 | 21.0 |  |
| Laboratory | 13C natural abundance | 146 | 28.5 | 71.5 | Werth and Kuzyakov, 2009 |
| Laboratory(ab) | 13C natural abundance | — | 71.8 | 28.2 | Li et al., 2010 |
| Laboratory(ac) | 13C natural abundance | — | 82.4 | 17.6 |  |

Note: a―High CO2 concentration and high nitrogen (N) fertilization; b―High CO2 concentration and low N fertilization; c―Low CO2 concentration and high N fertilization; d―Low CO2 concentration and low N fertilization; e―Monoculture; f―Intercropping; g―No N fertilization; h―N fertilization; i―Atmospheric CO2 concentration and low N fertilization, growing for 32 days; j―High CO2 concentration and low N fertilization, growing for 32 days; k―Atmospheric CO2 concentration and high N fertilization, growing for 32 days; l―High CO2 concentration and high N fertilization, growing for 32 days; m―Atmospheric CO2 concentration and low N fertilization, growing for 52 days; n―High CO2 concentration and low N fertilization, growing for 52 days; o―Atmospheric CO2 concentration and high N fertilization , growing for 52 days; p―High CO2 concentration and high N fertilization, growing for 52 days; q―Low phosphorus (P) and cultivated varieties Mat; r―Low P and cultivated varieties Mcit; s―High P and cultivated varieties Mat; t―High P and cultivated varieties Mcit; u―No N fertilization; v―N fertilization; w―Normal light length; x―Prolonged light length; y―Strong prolonged light length; z―14C pulse labeling method; aa―13C natural abundance method; ab―No N fertilization; ac―N fertilization.

**TABLE S4** Rhizosphere effects of wheat and maize on SOC decomposition

| **Crop type** | **Site** | **CO2 partitioning method** | **Crop type** | **Rhizosphere effect (%)** | **References** |
| --- | --- | --- | --- | --- | --- |
| **Wheat** | Laboratory | 13C natural abundance | 17 | -37 | Cheng, 1996 |
| Laboratory | 13C natural abundance | 110 | 96 | Cheng, 2003 |
| Laboratory | 13C continuous labeling | 60 | 86 | Pausch et al., 2013 |
| Laboratory(a) | 13C natural abundance | 56 | 40 | Wang et al., 2016 |
| Laboratory(b) | 13C natural abundance | 84 | 18 |  |
| Laboratory(c) | 13C pulse labeling | 230 | 47 | Sun, 2018 |
| Laboratory(d) | 13C pulse labeling | 230 | 59 |  |
| Laboratory(e) | 13C natural abundance | 32 | 176 | Xu et al., 2018 |
| Laboratory(f) | 13C natural abundance | 32 | 248 |  |
| Laboratory(g) | 13C natural abundance | 32 | 51 |  |
| Laboratory(h) | 13C natural abundance | 32 | 113 |  |
| Laboratory(i) | 13C natural abundance | 52 | 178 |  |
| Laboratory(j) | 13C natural abundance | 52 | 108 |  |
| Laboratory(k) | 13C natural abundance | 52 | 237 |  |
| Laboratory(l) | 13C natural abundance | 52 | 165 |  |
| Laboratory(m) | 13C natural abundance | 42 | 265 | Xu et al., 2019 |
|  | Laboratory(n) | 13C natural abundance | 42 | 403 |  |
|  | Laboratory(o) | 13C natural abundance | 42 | 392 |  |
|  | Laboratory(p) | 13C natural abundance | 42 | 461 |  |
|  | Laboratory | 13C natural abundance | 45 | 325 | Yin et al., 2019 |
| **Maize** | Field(q) | 13C natural abundance | 50 | 126 | Kumar et al., 2016 |
| Field(r) | 13C natural abundance | 50 | 35 |  |
| Laboratory | 14C pulse labeling/  13C natural abundance | 38 | 6 | Kuzyakov and Cheng, 2001 |
| Laboratory(s) | 13C natural abundance | 63 | -32 | Kuzyakov and Cheng, 2004 |
| Laboratory(t) | 13C natural abundance | 63 | -13 |  |
| Laboratory(u) | 13C natural abundance | 63 | -7 |  |
| Laboratory | 13C pulse labeling | 99 | 79 | Yang and Cai, 2005 |
| Laboratory(v) | 13C natural abundance | — | -22 | Li et al., 2010 |
| Laboratory(w) | 13C natural abundance | — | -38 |  |

Note: a―Growing for 56 days; b―Growing for 84 days; c―No N fertilization; d―N fertilization 250 kg ha-1; e―Atmospheric CO2 concentration and low N fertilization, growing for 32 days; f―High CO2 concentration and low N fertilization, growing for 32 days; g―Atmospheric CO2 concentration and high N fertilization, growing for 32 days; h―High CO2 concentration and high N fertilization, growing for 32 days; i―Atmospheric CO2 concentration and low N fertilization, growing for 52 days; j―High CO2 concentration and low N fertilization, growing for 52 days; k―Atmospheric CO2 concentration and high N fertilization, growing for 52 days; l―High CO2 concentration and high N fertilization, growing for 52 days; m―Low P and cultivated varieties Mat; n―Low P and cultivated varieties Mcit; o―High P and cultivated varieties Mat; p―High P and cultivated varieties Mcit; q―No N fertilization; r―N fertilization; s―Normal light length; t―Prolonged light length; u―Strong prolonged light length; v―No N fertilization; w―N fertilization.

**REFERENCES**

Ahmad, W., Singh, B., Dijkstra, F. A., Dalal, R. C., and Geelan-Small, P. (2014). Temperature sensitivity and carbon release in an acidic soil amended with lime and mulch. *Geoderma* 214-215, 168-176. doi: 10.1016/j.geoderma.2013.09.014

Bertrand, I., Delfosse, O., and Mary, B. (2007). Carbon and nitrogen mineralization in acidic, limed and calcareous agricultural soils: Apparent and actual effects. *Soil Boil. Biochem.* 39, 276-288.
doi: 10.1016/j.soilbio.2006.07.016

Biasi, C., Lind, S. E., Pekkarinen, N. M., Huttunen, J. T., Shurpali, N. J., Hyvönen, N. P., et al. (2008). Direct experimental evidence for the contribution of lime to CO2 release from managed peat soil. *Soil Boil. Biochem.* 40, 2660-2669. doi: 10.1016/j.soilbio.2008.07.011

Bramble., D. S. E., Gouveia, G. A., Ramnarine, R., and Farrell, R. E. (2020a). Short-term effects of aglime on inorganic- and organic-derived CO2 emissions from two acid soils amended with an ammonium-based fertiliser. *J. Soil. Sediment.* 20, 52-65. doi: 10.1007/s11368-019-02407-2

Bramble., D. S. E., Gouveia, G. A., Ramnarine, R., and Farrell, R. E. (2020b). Organic residue and agricultural lime interactions on CO2 emissions from two contrasting soils: implications for carbon management in acid soils. *J. Soil. Sediment.* doi: 10.1007/s11368-020-02736-7

Buysse, P., Goffin, S., Carnol, M., Malchair, S., Debacq, A., Longdoz, B., et al. (2013). Short-term temperature impact on soil heterotrophic respiration in limed agricultural soil samples. *Biogeochemistry* 112: 441-455. doi: 10.1007/s10533-012-9739-7

Cardinael, R., Chevallier, T., Guenet, B., Girardin, C., Cozzi, T., Pouteau, V., et al. (2020). Organic carbon decomposition rates with depth and contribution of inorganic carbon to CO2 emissions under a Mediterranean agroforestry system. *Eur. J. Soil Sci.* 71, 909-923. doi: 10.1111/ejss.12908

Čater, M., and Ogrinc, N. (2011). Soil respiration rates and in natural beech forest (*Fagus sylvatica* L.) in relation to stand structure. *Isot. Environ. Healt. S.* 47, 221-237. doi: 10.1080/10256016.2011.578214

Cheng, W. (1996). Measurement of rhizosphere respiration and organic matter decomposition using natural 13C. *Plant Soil* 183, 263-268. doi: 10.1007/BF00011441

Cheng, W., Johnson, D. W., and Fu, S. (2003). Rhizosphere effects on decomposition: controls of plant species, phenology and fertilization. *Soil Sci. Soc. Am. J.* 67, 1418-1427.

Chevallier, T., Cournac, L., Hamdi, S., Gallali, T., and Bernoux, M. (2016). Temperature dependence of CO2 emissions rates and isotopic signature from a calcareous soil. *J. Arid Environ.* 135, 132-139. doi: 10.1016/j.jaridenv.2016.08.002

Cho, S. R., Jeong, S. T., Kim, G. Y., Lee, J. G., Kim P. J., and Kim, G. W. (2019). Evaluation of the carbon dioxide (CO2) emission factor from lime applied in temperate upland soil. *Geoderma* 337, 742-748.

Dong, Y. J. (2013). Carbon stock and stabilization in *Lou* soil. [dissertation]. [Yangling (Shaanxi)]: Northwest Agricultural and Forestry University

Dumale, W. A., Miyazaki, T., Hirai, K., and Nishimura, T. (2011). SOC turnover and lime-CO2 evolution during liming of an acid Andisol and Ultisol. *Open J. Soil Sc.* 1, 49-53. doi: 10.4236/ojss.2011.12007

Fang, Y., Singh, B. P., Collins, D., Armstrong, R., Van Zwieten, L., and Tavakkoli, E. (2020a). Nutrient stoichiometry and labile carbon content of organic amendments control microbial biomass and carbon-use efficiency in a poorly structured sodic-subsoil. *Biol. Fert. Soils* 56, 219-233. doi: 10.1007/s00374-019-01413-3

Fang, Y., Singh, B. P., Farrell, M., Van Zwieten, L., Armstrong, R., Chen, C., et al. (2020b). Balanced nutrient stoichiometry of organic amendments enhances carbon priming in a poorly structured sodic subsoil. *Soil Boil. Biochem.* 145, 107800. doi: 10.1016/j.soilbio.2020.107800

Grover, S. P., Butterly, C. R., Wang, X., and Tang, C. (2017). The short-term effects of liming on organic carbon mineralisation in two acidic soils as affected by different rates and application depths of lime. *Biol. Fert. Soils* 53, 431-443. doi: 10.1007/s00374-017-1196-y

Ge, Y. H., Su, Y. R., Zou, D. S., Hu, L. N., Feng, S. Z., Xiao, W., et al. (2012). Organic carbon mineralization in lime soils in Karst region of Guangxi, South China in response to exogenous organic substrate and calcium carbonate. *Chinese Journal of Ecology* 31, 2748-2754.

Huang, Y., Su, Y. R., Liang, S. C., Chen, X. B., and He, X. Y. (2013). Responses of organic carbon mineralization in typical soils in northwest Guangxi of China to calcium carbonate and soil moisture. *Chinese Journal of Ecology* 32, 2695-2702.

Inglima, I., Alberti, G., Bertolini, T., Vaccari, F. P., Gioli, B., Miglietta, F., et al. (2009). Precipitation pulses enhance respiration of Mediterranean ecosystems: the balance between organic and inorganic components of increased soil CO2 efflux. *Global Change Biol.* 15, 1289-1301. doi: 10.1111/j.1365-2486.2008.01793.x

Kou, T. J., Xu, X. F., Zhu, J. G., Xie, Z. B., Guo, D. Y., and Miao, Y. F. (2011). Contribution of wheat rhizosphere respiration to soil respiration under elevated atmospheric CO2 and nitrogen application. *Chinese Journal of Applied Ecology* 22, 2533-2538. doi: 10.1080/00405000.2010.522047

Kumar, A., Kuzyakov, Y., and Pausch, J. (2016). Maize rhizosphere priming: field estimates using 13C natural abundance. *Plant Soil* 409, 87-97. doi: 10.1007/s11104-016-2958-2

Kuzyakov, Y., and Cheng, W. (2001). Photosynthesis controls of rhizosphere respiration and organic matter decomposition. *Soil Boil. Biochem.* 33, 1915-1925.

Kuzyakov, Y., and Cheng, W. (2004). Photosynthesis controls of CO2 efflux from maize rhizosphere. *Plant Soil* 263: 85-99. doi: 10.1023/B:PLSO.0000047728.61591.fd

Lardner, T., George, S., and Tibbett, M. (2015). Interacting controls on innate sources of CO2 efflux from a calcareous arid zone soil under experimental acidification and wetting. *J. Arid Environ.* 122, 117-123. doi: 10.1016/j.jaridenv.2015.07.001

Li, J. M., Ding, W. X., and Cai, Z. C. (2010). Effects of nitrogen fertilization on soil respiration during maize growth season. *Chinese Journal of Applied Ecolog*y 21, 2025-2030.

Ma, J., Li, Y., and Liu, R. (2015). The abiotic contribution to total CO2 flux for soils in arid zone. *Biogeoences Discussions* 12, 11217-11244. doi: 10.5194/bgd-12-11217-2015

Ma, J., Liu, R., and Li, Y. (2017). Abiotic contribution to total soil CO2 flux across a broad range of land-cover types in a desert region. *J. Arid Land* 9,13-26. doi: [10.1007/s40333-016-0061-4](https://doi.org/10.1007/s40333-016-0061-4)

Meng, Y., Cai, M., Shi, Q. Y., and Zhou, J. B. (2015). Effects of nitrogen fertilizer application on carbon dioxide emission from calcareous soil. *Chinese Journal of Soil Science* 46, 948-954.

Meng, Y., Li, X. S., Hao, P. Q., Zhang, Y. K., Zhang, Y. M., and Zhou, J. B. (2017) Effect of different N fertilizer applications on CO2 emissions from *Lou* soil in Central Shaanxi. *Journal of Agro-Environment Science* 36, 1901-1907.

Pausch, J., Zhu, B., Kuzyakov, Y.*,* and Cheng, W. (2013). Plant inter-species effects on rhizosphere priming of soil organic matter decomposition. *Soil Boil. Biochem.* 57, 91-99. doi: 10.1016/j.soilbio.2012.08.029

Plestenjak G, Eler K, Vodnik D, Ferlan M, Čater M, Kanduč T, et al. (2012). Sources of soil CO2 in calcareous grassland with woody plant encroachment. *J. Soil Sediment.* 12, 1327-1338. doi: 10.1007/s11368-012-0564-3

Ramnarine, R., Wagner-Riddle, C., Dunfield, K. E., and Voroney, R. P. (2012). Contributions of carbonates to soil CO2 emissions. *Can. J. Soil Sci.* 92, 599-607. doi: 10.1139/CJSS2011-025

Rochette, P., Flanagan, L. B., and Gregorich, E. G. (1999). Separating soil respiration into plant and soil components using analyses of the natural abundance of carbon-13. *Soil Sci. Soc. Am. J*. 63, 1207-1213. doi: 10.2136/sssaj1999.6351207x

Schindlbacher, A., Borken, W., Djukic, I., Brandstätter, C., Spötl, C., and Wanek, W. (2015). Contribution of carbonate weathering to the CO2 efflux from temperate forest soils. *Biogeochemistry* 124, 273-290. doi: 10.1007/s10533-015-0097-0

Shanhun, F. L., Almond, P. C., Clough, T. J., and Smith, C. M. S. (2012). Abiotic processes dominate CO2 fluxes in Antarctic soils. *Soil Boil. Biochem.* 53, 99-111. doi: 10.1016/j.soilbio.2012.04.027

Stevenson, B. A., and Verburg, P. S. J. (2006). Effluxed CO2-13C from sterilized and unsterilized treatments of a calcareous soil. *Soil Boil. Biochem.* 38, 1727-1733. doi: 10.1016/j.soilbio.2005.11.028

Sun, Z. A. (2018). Allocation of winter wheat photosynthesized carbon into soil carbon pool at different rates of nitrogen fertilization and nitrogen losses. [dissertation]. [Beijing]: China Agricultural University.

Tamir, G., Shenker, M., Heller, H., Bloom, P. R., Fine, P., and Bar-Tal, A. (2011). Can soil carbonate dissolution lead to overestimation of soil respiration? *Soil Sci. Soc. Am. J.* 75, 1414-1422. doi: 10.2136/sssaj2010.0396.

Wang, X., Tang, C., Severi, J., Butterly, C. R., and Baldock , J. A. (2016). Rhizosphere priming effect on soil organic carbon decomposition under plant species differing in soil acidification and root exudation. *New Phytol.* 211: 864-873. doi: 10.1111/nph.13966

Wang, Z., Xie, J., Wang, Y., and Li, Y. (2020). Biotic and abiotic contribution to diurnal soil CO2 fluxes from saline/alkaline soils. *Sci. Rep.* 10:5396. doi: 10.1038/s41598-020-62209-2

Werth, M., and Kuzyakov, Y. (2008). Root-derived carbon in soil respiration and microbial biomass determined by 14C and 13C. *Soil Boil. Biochem.* 40, 625-637. doi: 10.1016/j.soilbio.2007.09.022

Werth, M., and Kuzyakov, Y. (2009). Three-source partitioning of CO2 efflux from maize field soil by 13C natural abundance. *J. Plant Nutr. Soil Sci.* 172, 487-499. doi: 10.1002/jpln.200700085

Xiao, M. L., Chen, X. B., Li, Y., He, X. Y., Shen, Y., and Su, Y. R. (2014). Carbon release from brown limestone and red soils in response to addition of Fe(OH)3 and CaCO3. *Chinese Journal of Ecology* 33, 2936-2942. doi: 10.1084/jem.126.5.913

Xu, Q., Wang, X., and Tang, C. (2018). The effects of elevated CO2 and nitrogen availability on rhizosphere priming of soil organic matter under wheat and white lupin. *Plant Soil* 425, 375-387. doi: 10.1007/s11104-018-3601-1

Xu, Q., Wang, X., and Tang, C. (2019). Rhizosphere priming of two near-isogenic wheat lines varying in citrate efflux under different levels of phosphorus supply. *Ann. Bot.* 124, 1033-1042. doi: 10.1093/aob/mcz082

Yang, L. F., and Cai, Z. C. (2005). Soil respiration during maize growth period affected by N application rates. *Acta Pedologica Sinica* 42, 9-15.

Yin, L., Corneo, P. E., Richter, A.*,* Wang, P., Cheng, W., and Dijkstra, F. A. (2019). Variation in rhizosphere priming and microbial growth and carbon use efficiency caused by wheat genotypes and temperatures. *Soil Boil. Biochem.* 134, 54-61. doi: 10.1016/j.soilbio.2019.03.019

Yu, W. J. (2018). Effects of application of nitrogen fertilizer on carbon emissions and their sources from calcareous soils. [dissertation]. [Yangling (Shaanxi)]: Northwest Agricultural and Forestry University

Zhang, C., Sun, Y., Tang, G., and Liu, F. (2019). Contributions of carbonates to carbon dioxide release from a calcareous soil in response to experimental warming. *Soil Sci.* 184, 52-59. doi: 10.1097/SS.0000000000000251
